# Supplementary material
Source: HighWire-hosted journal article supplement (https://tech.snmjournals.org/highwire/filestream/8664/field_highwire_adjunct_files/0/194704_Supplemental_Data.pdf)
Supplement: 194704_Supplemental_Data.pdf [file 194704_Supplemental_Data.pdf]

2016 Quality Survey Questions and Categories

| Question                                                                                                             | Category | Response Options                                                                                                                                                                                                                                                                                                                                                                                                                                                                                                     |
|----------------------------------------------------------------------------------------------------------------------|----------|----------------------------------------------------------------------------------------------------------------------------------------------------------------------------------------------------------------------------------------------------------------------------------------------------------------------------------------------------------------------------------------------------------------------------------------------------------------------------------------------------------------------|
| <p>What three words or phrases come to mind when you think of Quality in nuclear medicine and molecular imaging?</p> | PQ       | Open text                                                                                                                                                                                                                                                                                                                                                                                                                                                                                                            |
| <p>Please use the space below to explain what quality in your workplace means to you.</p>                            | PQ       | Open text                                                                                                                                                                                                                                                                                                                                                                                                                                                                                                            |
| <p>What quality assurance measures do you and your facility currently use/evaluate? Select all that apply.</p>       | QM       | <p>Patient wait times/Regularity of equipment checks/Turnaround time (e.g. scan time, time to results, etc.)/Patient satisfaction/Referring physician satisfaction/ Image quality (motion or artifacts)/ Accuracy and completeness of reporting/Accuracy of image interpretation/Adequacy of stress testing/Adequacy of patient preparation/ Radiation dose reduction/Study appropriateness/Adverse event and misadministration/Other, please specify/My facility does not use quality assurance measures/Unsure</p> |

For the quality measures that you selected in the previous question, how effective is each in improving quality?

QM Scale 1 – 5, 1 = Not at all effective, 5 = Extremely effective

For the same quality measures that you selected previously, how often is each measure used/evaluated at your facility?

QM Daily/Weekly/Monthly/A few times a year/Once a year/Less often than once a year

Are there quality measures that your facility does not currently use, but that you believe should be used?

QM Open text

Please indicate your level of agreement or disagreement with the following statements regarding quality in nuclear medicine and molecular imaging:

QM Strongly disagree/Somewhat disagree/Neither agree nor disagree/Somewhat agree/Strongly agree

- The leaders of my organization emphasize the importance of quality
- My colleagues are committed to consistently delivering quality work
- I have adequate time in my workday to perform quality work
- My employer provides me with the necessary tools and resources I need to provide the highest quality care possible

- I am kept informed of all organizational quality initiatives
- I am confident in my ability to assess and improve quality in my workplace
- I believe quality is directly related to the education level of the technologist performing the scan

---

Through which formats are you most likely to participate in education and training? Select up to three formats.

EP Blended learning, combining in-person or classroom and online learning/Books or other print materials/In-person education events (conferences or courses)/Internal training provided by employer/Journal articles/Live webinars/Online discussion among a community of peers/Online self-guided with minimal interactivity/Online, self-paced, multi-session courses/Podcast/ Recorded webinar (on-demand)/Search for and view videos on platforms such as YouTube/Self-study with books or other print materials/Small, in-person group learning/Virtual attendance to an in-person event via live stream/Other, please specify

In addition to SNMMI, where else do you turn for information, resources, and training pertaining to nuclear medicine? Select the three most relevant and valuable organizations from the list below.

EP American Society of Radiologic Technologists (ASRT)/American Society of Nuclear Cardiology (ASNC)/European Association of Nuclear Medicine (EANM)/ Radiological Society of North America (RSNA)/Nuclear pharmacy companies (Triad Isotopes, Radiopharmacy, Inc., etc.)/Online webinar providers (Astellas, etc.)/I only turn to SNMMI/Other, please specify

What should be the minimum education standard for technologists in nuclear medicine?

EP Associate's degree/Associate's degree and certification(s) or license(s)/Bachelor's degree/ Bachelor's degree and certification(s) or license(s)/Master's degree or higher/Master's degree or higher and certification(s) or license(s)/There should be no minimum education standard/Other, please specify

Or

In your opinion, why do you believe that a minimum education standard should not be established for technologists in nuclear medicine?

From your perspective, please complete the following statement: Establishing a minimum education standard for nuclear medicine technologists would...

EP Open text

---

Considering the other organizations you turn to, PS Same as above  
which do you think best fits each of the following  
criteria?

- Offers the best continuing education opportunities
- Provides the best value for the cost
- Is most aligned with your area of professional focus
- Creates the best community of professionals from the field
- Provides the best conferences/meetings
- Is your first choice for news and information in the field

What value do the organizations you turn to PS Open text  
provide that SNMMI does not?

---

What trends and challenges do you believe will T Pressures to reduce patient wait times/  
have the greatest impact on technologists in the Pressures to reduce turnaround time on delivery  
nuclear medicine field in the next 3-5 years? of results/Earning or maintaining professional  
Select up to three. certifications/Keeping up with advancements in  
technology/Limitations of aging  
equipment/Changing job responsibilities/  
Infringement from other related specialties  
(radiologists, etc.)/Infringement on Scope of

---

practice, administer adjunct medicine, etc.  
 /Mergers of healthcare facilities and organizations/Increased competition for job opportunities/Increasing focus on patient satisfaction surveys/Declining numbers of nuclear medicine physicians/Lack of understanding of nuclear medicine among referring physicians/Lack of understanding of nuclear medicine among patients/the public/Increasing costs in nuclear medicine/ Increased use of teleradiology/Decreased reimbursements/Implementing Electronic Medical Records (EMR)/Quality reporting as part of registries, PQRS, or MPS/Impacts of the Affordable Care Act (ACA)/Other, please specify

How would you rate SNMMI’s effectiveness in addressing the trends and challenges you selected in the previous question? T Scale 1 – 5, 1 = Not at all effective, 5 = Extremely effective

What resources or services could SNMMI offer that would help you address the trends and challenges you are facing? T Open text

---

Which of the following best describes your SNMMI membership status? D Currently a member/I was a member but not currently /Never a member/Unsure

Which of the following best describes your current position/role?

D Staff Technologist/Senior Staff Technologist/  
Chief Technologist/Team Leader/Manager/  
Educator/ Technical Specialist/Hospital  
Administrator/Industry

Which organization is your facility accredited by?  
Select all that apply.

D The American College of Radiology (ACR)/The  
Joint Commission/Intersocietal Accreditation  
Commission/Other, please specify/My facility is  
not currently accredited

1Approximately how long has it been since your facility last went through an accreditation/re-accreditation process?

D Less than 6 months/6 months – 1 year/1 year –  
2 years/2 years – 3 years/More than 3 years/  
Unsure

Does your state require nuclear medicine technologists to be licensed?

D Yes/No/Unsure

Which, if any, of the following certifications do you hold? Select all that apply.

D Registered Technologist (RT) (through the  
American Registry of Radiologic Technologists)/  
Certified Nuclear Medicine Technologist (CNMT)  
(Through the Nuclear Medicine Technology  
Certification Board)/ Specialty certification in  
positron emission tomography (PET)/Specialty  
certification in nuclear cardiology (NCT)/  
Specialty certification in computed tomography  
(CT)/Specialty certification in magnetic

- resonance imaging (MRI)/Other certification,  
please specify/I do not currently hold any  
certifications
- Which of the following best describes the setting  
in which you primarily work? D Private practice/Community hospital/  
University-affiliated teaching hospital and  
medical center/Outpatient imaging facility/  
Public health institution/Government and  
private research institute/Other, please specify
- What is your primary area of expertise? D Nuclear medicine/Cardiology/Radiology/  
Oncology/Medical Physics/Molecular  
Imaging/Nanomedicine/Optical Imaging/  
Radiopharmaceutical Chemistry/  
Radiopharmacy/Other, please specify
- Approximately what percentage of your time at  
work is spent on nuclear medicine? D 0-10%/11-20%/21-30%/31-40%/41-50%/51-  
60%/61-70%/71-80%/81-90%/91-100%
- How long have you worked in the nuclear  
medicine and molecular imaging field? D 1 year or less/2-5 years/6-10 years/11-20 years/  
Over 20 years/Prefer not to answer
- In what country do you currently reside? D Drop down of countries
- In which state do you reside? D Drop down of states
- What is your age? D 18-24 years old/25-34 years old/35-44 years old/  
45-54 years old/55-64 years old/65 years or  
older/Prefer not to answer



- What is your highest level of education attained? D High School Diploma/Associate's degree/  
Bachelor's degree/Master's degree/ Doctorate/  
Other, please specify/Prefer not to answer
- What is your gender? D Male/Female/Prefer not to answer
- Which of the following best describes your race/ethnicity? D African-American, Black/Asian, Asian-American/  
Caucasian, White/Hispanic/Non-White Hispanic/  
Middle Eastern/Native American. Alaskan  
Native/Pacific Islander/Other, please specify/  
Prefer not to answer

---

D – Demographic (16), PQ – Perception of Quality (2), QM – Quality Measures (5), EP – Education and Professional Development (4), P - Professional Society (2), T -Trends and Challenges (3)
